# Supplementary material for: Ultrathin nanosheet-decorated honeycomb-like Co3O4 porous balls for high performance lithium-ion batteries
Source: Royal Society of Chemistry journal article supplement (doi:10.1039/d3nj03143h), 2023-01-01
Supplement: d3nj03143h1.pdf [file d3nj03143h1.pdf]

# **Ultrathin nanosheets-decorated honeycomb-like $\text{Co}_3\text{O}_4$ porous balls for high performance lithium-ion batteries**

Yumei Wang\*, Jimei Song, Fangfang Liu, Xiuting Lang, Lingyun Ren

College of Chemical Engineering and Environment, Weifang University of Science

and Technology, Weifang 262700, P. R. China

Corresponding author: wangyumei7608@163.com

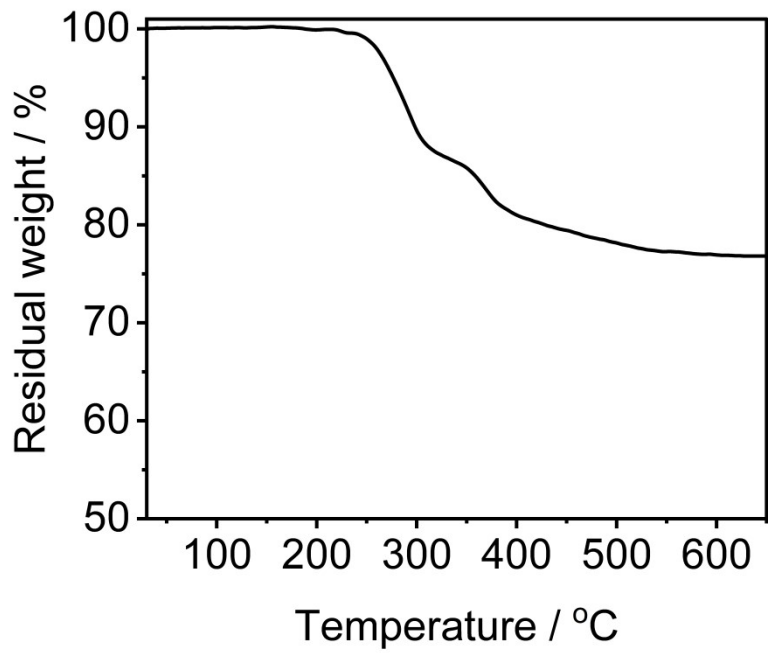

Fig. S1 TGA curve of honeycomb-like  $\text{Co}_3\text{O}_4$  porous balls precursor

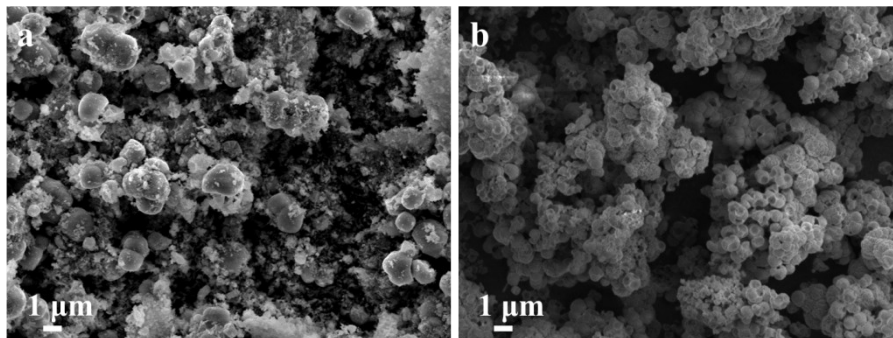

Fig. S2 SEM images of (a) 6M  $\text{Co}_3\text{O}_4$  and (b) 12M  $\text{Co}_3\text{O}_4$

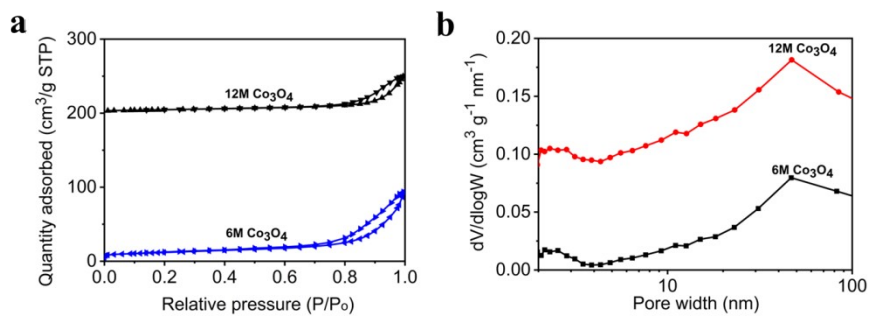

Fig. S3  $\text{N}_2$  adsorption-desorption isotherms (a), pore size distribution (b) of 6M  $\text{Co}_3\text{O}_4$  and 12M  $\text{Co}_3\text{O}_4$

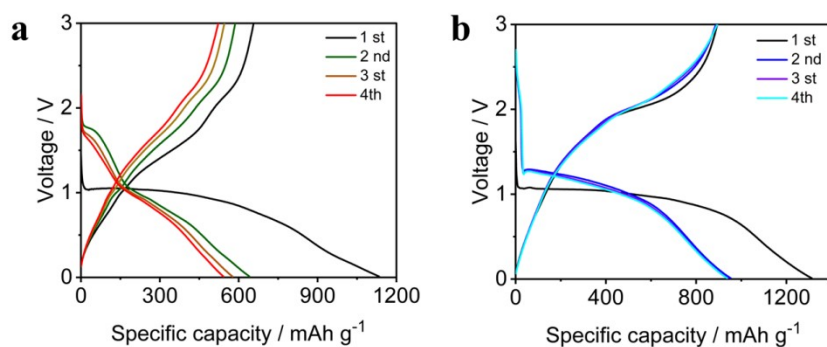

Fig. S4 Charge-discharge curves at  $0.5 \text{ A g}^{-1}$  of (a)  $6\text{M Co}_3\text{O}_4$  and (b)  $12\text{M Co}_3\text{O}_4$

Table S1 List of the reports on Co-based anodes for electrochemical performance

| Sample                                       | Current density/(mA g <sup>-1</sup> ) | Cycles | Capacity/(mAh g <sup>-1</sup> ) | Reference |
|----------------------------------------------|---------------------------------------|--------|---------------------------------|-----------|
| Co <sub>3</sub> O <sub>4</sub> /CoO/C        | 1000                                  | 250    | 545                             | [1]       |
| Co <sub>3</sub> O <sub>4</sub> /Co           | 100                                   | 200    | 690                             | [2]       |
| CoO/C                                        | 100                                   | 52     | 633                             | [3]       |
| Hollow CoO                                   | 71.6                                  | 50     | 832                             | [4]       |
| Co <sub>3</sub> O <sub>4</sub> hexagonal     | 500                                   | 100    | 606                             | [5]       |
| Co <sub>3</sub> O <sub>4</sub> nanoparticles | 200                                   | 200    | 806.7                           | [6]       |
| peanut-like Co <sub>3</sub> O <sub>4</sub>   | 200                                   | 70     | 700                             | [7]       |
| honeycomb-like                               | 500                                   | 230    | 726                             | This work |
| Co <sub>3</sub> O <sub>4</sub> porous balls  | 2000                                  | 500    | 540                             |           |

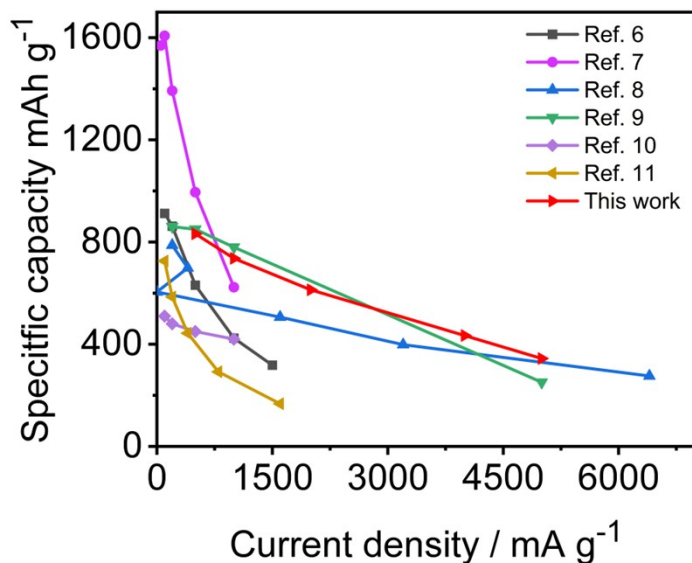

Fig. S5 The comparison of rate capacity for previous studies and this work at various current densities.

#### Reference

- [1] R. Huang, R. Zhou, L. Wang, Y. Zhu, Dandelion-like CoO/Co<sub>3</sub>O<sub>4</sub>/carbon composites as anode materials for a high-performance lithium ion battery, *ChemistrySelect*, 5 (2020) 12932-12939.
- [2] W. Zhong, X. Huang, Y. Lin, Y. Cao, Z. Wang, Compact Co<sub>3</sub>O<sub>4</sub>/Co in-situ nanocomposites prepared by pulsed laser sintering as anode materials for lithium-ion batteries, *Journal of Energy Chemistry*, 58 (2021) 386-390.
- [3] M. Zhang, E. Uchaker, S. Hu, Q. Zhang, T. Wang, G. Cao, J. Li, CoO-carbon nanofiber networks prepared by electrospinning as binder-free anode materials for lithium-ion batteries with enhanced properties, *Nanoscale*, 5 (2013) 12342-12349.
- [4] Z. Wen, F. Zheng, Z. Jiang, M. Li, Y. Luo, Solvothermal synthesis of solid and hollow CoO nanospheres and their electrochemical properties in lithium-ion battery, *Journal of Materials Science*, 48 (2013) 342-347.
- [5] A.R. Mule, D. Narsimulu, A.K. Kakarla, J.S. Yu, Three-dimensional porous Co<sub>3</sub>O<sub>4</sub> hexagonal plates grown on nickel foam as a high-capacity anode material for lithium-ion batteries, *Applied Surface Science*, 551 (2021) 148942-148950.
- [6] H. Zhang, F. Wang, Y. Wang, H. Wei, W. Zhang, R. Cao, H. Zheng, Two-dimensional hollow

carbon skeleton decorated with ultrafine  $\text{Co}_3\text{O}_4$  nanoparticles for enhanced lithium storage, *Journal of Colloid and Interface Science*, 631 (2023) 191-200.

[7] Y. Dai, X. Fang, T. Yang, W. Wang, Construction of the peanut-like  $\text{Co}_3\text{O}_4$  as anode materials for high-performance lithium-ion batteries, *Ionics*, 26 (2019) 1261-1265.

[8] A. Guo, X. Chen, J. Zhao, K. Yang, X. Zhang, C. Ding, X. Yang, Hierarchical porous  $\text{Co-CoO@NC}$  hollow microspheres with capacity growth by reactivation of solid-electrolyte interface films, *Journal of Colloid and Interface Science*, 640 (2023) 829-838.

[9] Y. Liu, H. Zhang, N. Jiang, W. Zhang, H. Arandiyani, Z. Wang, S. Luo, F. Fang, H. Sun, Porous  $\text{Co}_3\text{O}_4@CoO$  composite nanosheets as improved anodes for lithium-ion batteries, *Journal of Alloys and Compounds*, 834 (2020) 155030.

[10] J.K. Kim, J.Y. Ju, S.K. Choi, S. Unithrattil, S.S. Lee, Y. Kang, Y. Kim, W.B. Im, S. Choi, In-situ preparation and unique electrochemical behavior of pore-embedding  $\text{CoO/Co}_3\text{O}_4$  intermixed composite for  $\text{Li}^+$  rechargeable battery electrodes, *Journal of Power Sources*, 378 (2018) 562-570.

[11] F. Zheng, K. Shi, S. Xu, X. Liang, Y. Chen, Y. Zhang, Facile fabrication of highly porous  $\text{Co}_3\text{O}_4$  nanobelts as anode materials for lithium-ion batteries, *RSC Advances*, 6 (2016) 9640-9646.
